# Supplementary material
Source: PubMed Central journal article supplement (PMC4529774)
Supplement: NIHMS696773-supplement-supplement_1.pdf [file NIHMS696773-supplement-supplement_1.pdf]

**Table 1S:** Characteristics of Biomarker Laboratory Assays

| <b>Laboratory Assay</b>                                               | <b>Manufacturer</b>                                     | <b>Range</b>       | <b>Sensitivity</b> | <b>Interassay CV<br/>(upper value)</b> | <b>Interassay CV<br/>(lower value)</b> |
|-----------------------------------------------------------------------|---------------------------------------------------------|--------------------|--------------------|----------------------------------------|----------------------------------------|
| Presage ST2 Assay                                                     | Critical Diagnostics,<br>San Diego, CA                  | 3.12 - 200 ng/ml   | 2.4 ng/ml          | 2.4% at 159.1 ng/ml                    | 6.5% at 16.9 ng/ml                     |
| Quantikine Human<br>GDF-15<br>Immunoassay                             | R&D Systems,<br>Minneapolis, MN                         | 23.4 - 1,500 pg/ml | 4.39 pg/ml         | 5.6% at 900 pg/ml                      | 6.0% at 225 pg/ml                      |
| Advia Centaur TnI-<br>Ultra Assay                                     | Siemens Medical Solutions<br>Diagnostics, Tarrytown, NY | 0.006 - 50 ng/ml   | 0.006 ng/ml        | 1.9% at 27.2 ng/ml                     | 5.1% at 0.08 ng/ml                     |
| Roche E Modular<br>NT-ProBNP Assay                                    | Roche Diagnostics<br>Corporation, Indianapolis, IN      | 10 - 25,000 pg/ml  | 1 pg/ml            | 1.3% at 5449 pg/ml                     | 2.0% at 248.9 pg/ml                    |
| Quantikine Human<br>Cystatin C<br>Immunoassay                         | R&D Systems,<br>Minneapolis, MN                         | 3.12 - 100 ng/ml   | 0.227 ng/ml        | 5.9% at 60.9 ng/ml                     | 7.0% at 17.2 ng/ml                     |
| Quantikine Human<br>IL-6 Immunoassay                                  | R&D Systems,<br>Minneapolis, MN                         | 3.12 - 300 pg/ml   | 0.7 pg/ml          | 3.8% at 191 pg/ml                      | 6.4% at 17.2 pg/ml                     |
| CardioPhase High<br>Sensitivity C-<br>Reactive Protein<br>Immunoassay | Siemens Medical Solutions<br>Diagnostics, Tarrytown, NY | 0.16 – 10 mg/L     | 0.05 mg/L          | 0.9% at 5.39 mg/L                      | 2.9% at 0.42 mg/L                      |
| Zymutest D-Dimer<br>ELISA                                             | Aniara, West Chester, Ohio                              | 2 – 2000 ng/ml     | 0.5 ng/ml          | 3.3% at 204 ng/ml                      | 4.0% at 51 ng/ml                       |
| Abbreviations: CV, coefficient of variation                           |                                                         |                    |                    |                                        |                                        |

**Table 2S:** Echocardiographic Measures and Study Outcomes for Treated, Virally-Suppressed HIV-Infected Participants and Controls

|                                                                                                                                                                                                                           | <b>HIV+<br/>(N = 178)</b> | <b>Control<br/>(N = 50)</b> | <b>P-value</b> |
|---------------------------------------------------------------------------------------------------------------------------------------------------------------------------------------------------------------------------|---------------------------|-----------------------------|----------------|
| Ejection Fraction (%)                                                                                                                                                                                                     | 61.0 (56.0-65.0)          | 61.5 (59.0-67.0)            | 0.19           |
| Systolic Dysfunction                                                                                                                                                                                                      | 7 (4%)                    | 0                           | 0.35           |
| Diastolic Dysfunction                                                                                                                                                                                                     | 72 (42%)                  | 14 (28%)                    | 0.10           |
| Stage 1                                                                                                                                                                                                                   | 67 (93%)                  | 14 (100%)                   | 0.59           |
| LV Mass Index (gm/m <sup>2</sup> )                                                                                                                                                                                        | 71.1 (71.1-73.6)          | 66.4 (63.0-72.6)            | 0.02           |
| Pulmonary Hypertension                                                                                                                                                                                                    | 53 (30%)                  | 1 (2.0%)                    | <0.001         |
| PASP (mmHg)                                                                                                                                                                                                               | 31.0 (25.0-37.0)          | 22.5 (19.0-25.0)            | <0.001         |
| Mortality Rate*                                                                                                                                                                                                           | 7.3% (4.4%-12.1%)         | 4.0% (1.3%-12.3%)           | 0.34           |
| Data are presented as Median (IQR) or numbers (percent).<br>* Mortality is reported as five-year rate (95% CI)<br>Abbreviations: LV, left ventricular; PASP, pulmonary artery systolic pressure; IQR, interquartile range |                           |                             |                |

**Table 3S: Baseline Characteristics of HIV-Infected Participants by Mortality Status**

| Characteristic                       | Deceased<br>(N = 38) | Alive<br>(N = 294) | P-value |
|--------------------------------------|----------------------|--------------------|---------|
| Age (y)                              | 51 (43-56)           | 48 (42-54)         | 0.27    |
| Male                                 | 28 (74%)             | 242 (82%)          | 0.19    |
| Race                                 |                      |                    | 0.089   |
| Caucasian                            | 16 (42%)             | 170 (58%)          |         |
| African American                     | 19 (50%)             | 86 (29%)           |         |
| Latino                               | 2 (5%)               | 20 (7%)            |         |
| Other                                | 1 (3%)               | 18 (6%)            |         |
| Cigarette smoking                    |                      |                    | 0.079   |
| Current                              | 19 (50%)             | 98 (33%)           |         |
| Past                                 | 11 (29%)             | 87 (30%)           |         |
| Never                                | 8 (21%)              | 109 (37%)          |         |
| Coronary artery disease              | 2 (5%)               | 11 (4%)            | 0.65    |
| Diabetes mellitus                    | 5 (13%)              | 22 (7%)            | 0.21    |
| Hypertension                         | 14 (37%)             | 98 (33%)           | 0.72    |
| Dyslipidemia                         | 11 (55%)             | 119 (59%)          | 0.81    |
| LDL cholesterol (mg/dL)              | 97 (63-130)          | 101 (77-128)       | 0.58    |
| HDL cholesterol (mg/dL)              | 52 (45-59)           | 47 (38-55)         | 0.20    |
| Triglycerides (mg/dL)                | 185 (73-252)         | 148 (101-258)      | 0.73    |
| Total cholesterol (mg/dL)            | 186 (149-213)        | 184 (152-215)      | 0.83    |
| Systolic blood pressure (mmHg)       | 122 (113-130)        | 120 (110-130)      | 0.16    |
| Body mass index (kg/m <sup>2</sup> ) | 24 (22-29)           | 25 (23-29)         | 0.18    |
| Duration of HIV infection (y)        | 16 (13-20)           | 14 (9-18)          | 0.027   |
| ARV use:                             |                      |                    | 0.29    |
| Current                              | 34 (89%)             | 227 (77%)          |         |
| Past                                 | 1 (3%)               | 19 (6%)            |         |
| Never                                | 3 (8%)               | 48 (16%)           |         |
| HAART use                            | 33 (87%)             | 232 (79%)          | 0.29    |
| HAART duration (y)*                  | 5.0 (2.2-7.2)        | 5.4 (2.2-7.7)      | ---     |
| NRTI use                             | 35 (92%)             | 245 (83%)          | 0.23    |
| NRTI duration (y)*                   | 7.2 (1.0-9.8)        | 7.1 (2.4-9.8)      | ---     |
| NNRTI use                            | 16 (42%)             | 141 (48%)          | 0.61    |
| NNRTI duration (y)*                  | 2.4 (0.7-5.0)        | 3.3 (1.3-5.5)      | ---     |

|                                                                                                                                                                                                                                            |               |               |        |
|--------------------------------------------------------------------------------------------------------------------------------------------------------------------------------------------------------------------------------------------|---------------|---------------|--------|
| PI use                                                                                                                                                                                                                                     | 32 (84%)      | 210 (71%)     | 0.12   |
| PI duration (y)                                                                                                                                                                                                                            | 5.1 (2.2-7.8) | 5.4 (2.5-7.8) | ---    |
| Current Abacavir use                                                                                                                                                                                                                       | 10 (26%)      | 89 (30%)      | 0.71   |
| Current CD4 (cells/mm <sup>3</sup> )                                                                                                                                                                                                       | 248 (168-477) | 488 (314-708) | <0.001 |
| Nadir CD4 (cells/mm <sup>3</sup> )                                                                                                                                                                                                         | 88 (20-206)   | 176 (50-309)  | 0.020  |
| Plasma HIV RNA (copies/ml):                                                                                                                                                                                                                |               |               | 0.0029 |
| <75                                                                                                                                                                                                                                        | 16 (42%)      | 182 (62%)     |        |
| 75-1999                                                                                                                                                                                                                                    | 6 (16%)       | 54 (18%)      |        |
| 2000-9999                                                                                                                                                                                                                                  | 3 (8%)        | 26 (9%)       |        |
| >10000                                                                                                                                                                                                                                     | 13 (34%)      | 31 (11%)      |        |
| History of opportunistic infection                                                                                                                                                                                                         | 18 (47%)      | 75 (26%)      | 0.0070 |
| Hepatitis C infection                                                                                                                                                                                                                      | 20 (53%)      | 67 (23%)      | <0.001 |
| Data are presented as Median (IQR) or numbers (percent).                                                                                                                                                                                   |               |               |        |
| *Duration of ARV use among ever users.                                                                                                                                                                                                     |               |               |        |
| Abbreviations: ARV, antiretroviral; IQR, interquartile range; HAART, highly active antiretroviral therapy; NRTI, nucleoside reverse transcriptase inhibitor; NNRTI, nonnucleoside reverse transcriptase inhibitor; PI, protease inhibitor. |               |               |        |

**Table 4S:** Correlations of Biomarkers among HIV-Infected Participants

|                   | <b>ST2</b> | <b>NT-proBNP</b> | <b>GDF-15</b> | <b>Cystatin C</b> | <b>IL-6</b> | <b>D-dimer</b> | <b>hsTnI</b> | <b>hsCRP</b> |
|-------------------|------------|------------------|---------------|-------------------|-------------|----------------|--------------|--------------|
| <b>ST2</b>        | 1          | 0.08             | 0.20*         | 0.17*             | 0.16*       | 0.06           | 0.04         | 0.12*        |
| <b>NT-proBNP</b>  |            | 1                | 0.22*         | 0.32*             | 0.11        | 0.16*          | -0.04        | 0.07         |
| <b>GDF-15</b>     |            |                  | 1             | 0.31*             | -0.02       | 0.07           | -0.09        | 0.07         |
| <b>Cystatin C</b> |            |                  |               | 1                 | 0.19*       | 0.20*          | -0.05        | 0.13*        |
| <b>IL-6</b>       |            |                  |               |                   | 1           | 0.25*          | 0.19*        | 0.35*        |
| <b>D-dimer</b>    |            |                  |               |                   |             | 1              | -0.06        | 0.33*        |
| <b>hsTnI</b>      |            |                  |               |                   |             |                | 1            | 0.02         |
| <b>hsCRP</b>      |            |                  |               |                   |             |                |              | 1            |

\*Denotes statistical significance (p<0.05) of Spearman Correlations above

**Table 5S:** Concentration of Biomarkers for Treated, Virally-Suppressed HIV-Infected Participants and Controls

| Biomarker                | HIV+<br>(N = 178)  | Control<br>(N = 50) | HIV+ versus Control  |         |                      |         |
|--------------------------|--------------------|---------------------|----------------------|---------|----------------------|---------|
|                          |                    |                     | Unadjusted %Estimate | P-value | Adjusted %Estimate*  | P-value |
| ST2 (ng/ml)              | 28.0 (22.7, 36.9)  | 29.2 (23.8, 33.0)   | 4.9 (-5.5, 16.5)     | 0.37    | 7.8 (-2.6, 19.2)     | 0.15    |
| NT-proBNP (pg/ml)        | 39.5 (19.7, 100.3) | 17.7 (11.9, 32.2)   | 159.7 (94.6, 246.5)  | <0.001  | 125.9 (70.3, 199.6)  | <0.001  |
| GDF-15 (pg/ml)           | 1072 (645, 1900)   | 336 (263, 431)      | 264.3 (204.7, 335.6) | <0.001  | 250.1 (192.5, 319.1) | <0.001  |
| hsCRP (mg/L)             | 3.1 (1.1, 6.1)     | 1.9 (0.4, 4.5)      | 82.0 (21.9, 171.6)   | 0.003   | 75.1 (16.3, 163.6)   | 0.007   |
| IL-6 (pg/ml)             | 3.1 (1.4, 5.8)     | 2.3 (1.4, 3.8)      | 23.8 (-8.9, 68.3)    | 0.17    | 19.1 (-13.8, 64.6)   | 0.29    |
| Cystatin C (mg/L)        | 0.77 (0.64, 0.93)  | 0.61 (0.47, 0.64)   | 41.4 (27.9, 56.3)    | <0.001  | 39.9 (26.0, 55.2)    | <0.001  |
| D-Dimer (ng/mL)          | 221 (144, 355)     | 183 (114, 265)      | 30.8 (9.5, 56.3)     | 0.003   | 22.5 (3.8, 44.5)     | 0.02    |
| Detectable hsTnI (ng/ml) | 45 (27%)           | 7 (14%)             | 92.9 (7.8, 245.2)    | 0.03    | 109.9 (1.4, 334.6)   | 0.04    |

Data are presented as Median (IQR) or Percent (95% Confidence Interval)  
\*Adjusted for Age, Gender and eGFR

**Table 6S:** Tests for Interactions between Individual Biomarkers with Viremia and Anti-retroviral Treatment Status for Study Outcomes in HIV-Infected Participants

| <b>Outcome</b>                                      | <b>Detectable VL x Marker<br/>P-value</b> | <b>ARV Treatment x Marker<br/>P-value</b> |
|-----------------------------------------------------|-------------------------------------------|-------------------------------------------|
| <b>Diastolic Dysfunction</b>                        |                                           |                                           |
| ST2                                                 | 0.74                                      | 0.83                                      |
| NT-proBNP                                           | 0.56                                      | 0.42                                      |
| hsCRP                                               | 0.73                                      | 0.39                                      |
| GDF-15                                              | 0.48                                      | 0.12                                      |
| Cystatin C                                          | 0.71                                      | 0.89                                      |
| IL-6                                                | 0.72                                      | 0.94                                      |
| D-dimer                                             | 0.76                                      | 0.89                                      |
| Detectable Troponin                                 | 0.46                                      | 0.21                                      |
| <b>Pulmonary Hypertension</b>                       |                                           |                                           |
| ST2                                                 | 0.89                                      | 0.71                                      |
| NT-proBNP                                           | 0.51                                      | 0.92                                      |
| hsCRP                                               | 0.59                                      | 0.92                                      |
| GDF-15                                              | 0.47                                      | 0.67                                      |
| Cystatin C                                          | 0.72                                      | 0.65                                      |
| IL-6                                                | 0.34                                      | 0.56                                      |
| D-dimer                                             | 0.32                                      | 0.65                                      |
| Detectable Troponin                                 | 0.07                                      | 0.62                                      |
| <b>All-cause mortality</b>                          |                                           |                                           |
| ST2                                                 | 0.049                                     | 0.077                                     |
| NT-proBNP                                           | 0.88                                      | 0.34                                      |
| hsCRP                                               | 0.40                                      | 0.96                                      |
| GDF-15                                              | 0.20                                      | 0.16                                      |
| Cystatin C                                          | 0.83                                      | 0.38                                      |
| IL-6                                                | 0.096                                     | 0.49                                      |
| D-dimer                                             | 0.41                                      | 0.66                                      |
| Detectable Troponin                                 | 0.17                                      | 0.49                                      |
| Abbreviations: ARV, anti-retroviral; VL, viral load |                                           |                                           |

**Table 7S:** Associations between Individual Biomarkers with Diastolic Dysfunction, Pulmonary Hypertension, and All-cause Mortality in Treated, Virally-Suppressed HIV-Infected Participants

| <b>Outcome</b>                | <b>Demographic-adjusted<br/>RR (95% CI)</b> | <b>Fully adjusted*<br/>RR (95% CI)</b>  |
|-------------------------------|---------------------------------------------|-----------------------------------------|
| <b>Diastolic Dysfunction</b>  |                                             |                                         |
| ST2                           | 1.26 (0.80, 1.99), p=0.32                   | 1.27 (0.78, 2.06), p=0.33               |
| NT-proBNP                     | 1.03 (0.92, 1.16), p=0.58                   | 1.01 (0.88, 1.15), p=0.88               |
| hsCRP                         | 1.08 (0.95, 1.23), p=0.21                   | 1.11 (0.96, 1.28), p=0.15               |
| GDF-15                        | 1.00 (0.84, 1.19), p=0.97                   | 0.98 (0.82, 1.19), p=0.87               |
| Cystatin C                    | 1.13 (0.78, 1.63), p=0.51                   | 0.99 (0.61, 1.61), p=0.98               |
| IL-6                          | 1.07 (0.93, 1.23), p=0.36                   | 1.06 (0.91, 1.23), p=0.47               |
| D-dimer                       | 1.16 (0.91, 1.48), p=0.23                   | 1.19 (0.91, 1.54), p=0.20               |
| Detectable Troponin           | 1.37 (0.83, 2.27), p=0.22                   | 1.24 (0.73, 2.12), p=0.42               |
| <b>Pulmonary Hypertension</b> |                                             |                                         |
| ST2                           | 1.28 (0.79, 2.08), p=0.31                   | 1.34 (0.78, 2.30), p=0.29               |
| NT-proBNP                     | 1.10 (0.97, 1.26), p=0.13                   | 1.14 (0.98, 1.34), p=0.09               |
| hsCRP                         | 1.09 (0.95, 1.26), p=0.21                   | 1.07 (0.92, 1.24), p=0.38               |
| GDF-15                        | 1.15 (0.95, 1.39), p=0.16                   | 1.15 (0.93, 1.43), p=0.21               |
| Cystatin C                    | 1.28 (0.88, 1.86), p=0.19                   | 1.39 (0.86, 2.25), p=0.18               |
| IL-6                          | 1.05 (0.90, 1.24), p=0.52                   | 1.09 (0.92, 1.30), p=0.33               |
| D-dimer                       | 1.26 (0.95, 1.67), p=0.11                   | 1.23 (0.90, 1.67), p=0.19               |
| Detectable Troponin           | 1.01 (0.53, 1.89), p=0.99                   | 1.26 (0.64, 2.46), p=0.51               |
| <b>All-cause mortality</b>    |                                             |                                         |
|                               | <b>Demographic-adjusted<br/>HR (95% CI)</b> | <b>Fully adjusted**<br/>HR (95% CI)</b> |
| ST2                           | 3.96 (1.52, 10.35), p=0.0050                | 4.12 (1.39, 12.20), p=0.011             |
| NT-proBNP                     | 1.30 (1.03, 1.63), p=0.028                  | 1.20 (0.92, 1.57), p=0.18               |
| hsCRP                         | 1.38 (1.02, 1.87), p=0.036                  | 1.54 (1.05, 2.25), p=0.027              |
| GDF-15                        | 1.95 (1.35, 2.81), p<0.001                  | 1.89 (1.23, 2.90), p=0.0035             |
| Cystatin C                    | 1.81 (0.93, 3.51), p=0.079                  | 1.33 (0.56, 3.14), p=0.52               |
| IL-6                          | 1.58 (1.03, 2.42), p=0.035                  | 1.46 (0.93, 2.28), p=0.097              |
| D-dimer                       | 2.28 (1.26, 4.10), p=0.0061                 | 2.05 (1.09, 3.87), p=0.027              |
| Detectable Troponin           | 1.87 (0.58, 5.97), p=0.29                   | 1.72 (0.49, 6.05), p=0.40               |

\* For Diastolic Dysfunction and Pulmonary Hypertension, fully adjusted Poisson models control for age, gender, ethnicity, CVD risk factors (history of DM, HTN, Prior CAD, Prior MI, CHF, CKD, family history of CAD, Prior Stroke, current tobacco use, HDL, LDL), CD4 count, and HIVRNA.

\*\*For All-cause mortality, fully adjusted Cox models control for age, gender, ethnicity, HCV, history of OI, use of aspirin or clopidogrel, and current CD4 count.



**Figure 1S:** Comparison of Model Discrimination for All-Cause Mortality with and without Biomarkers

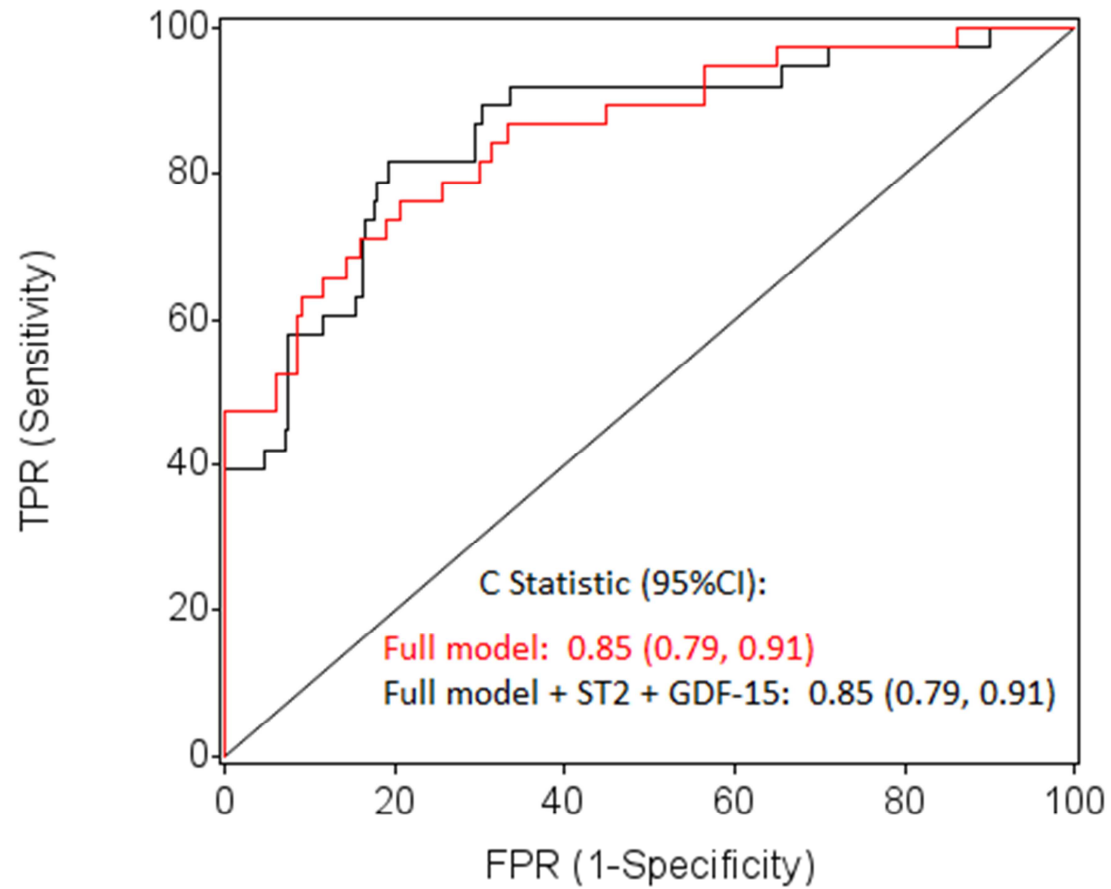

**Figure Legend:** Red line denotes model without biomarkers. Black line denotes model with ST2 and GDF15. Model discrimination is assessed using Harrell's C-index of concordance for survival models. Fully adjusted Cox models control for age, gender, ethnicity, HIVRNA, HCV, history of OI, use of aspirin or clopidogrel, and current CD4 count. FPR, false positive rate; TPR, true positive rate.
